# Supplementary material for: Maslinic acid induces autophagy and ferroptosis via transcriptomic and metabolomic reprogramming in prostate cancer cells
Source: Front Pharmacol. 2024 Nov 18;15:1453447. doi: 10.3389/fphar.2024.1453447 (PMC11608986; doi:10.3389/fphar.2024.1453447)
Supplement: Supplementary file 3 [file Table1.xlsx]

## Sheet: MA_vs_control.DEG_up
Supplementary Table 1. Differentially expressed genes obtained by transcriptome analysis.
gene_id	expression	log2FoldChange	p	MA-1	MA-2	MA-3	MA-4	DMSO-1	DMSO-2	DMSO-3	DMSO-4	symbol
ENSMUSG00000026628	up	2.2925	0	3526	4055	3518	4375	872	901	784	1010	Atf3
ENSMUSG00000025283	up	1.0383	0	43172	46869	39605	47918	23479	24304	23085	26635	Sat1
ENSMUSG00000028195	up	1.6927	0	7855	8745	7332	8883	2844	2862	2792	2932	Ccn1
ENSMUSG00000028680	up	1.3622	0	8069	8953	6969	8455	3536	3678	3214	3786	Plk3
ENSMUSG00000001467	up	1.6423	0	3851	4262	3255	4167	1340	1470	1246	1548	Cyp51
ENSMUSG00000029304	up	1.1211	0	138105	153371	121053	147883	70956	71536	68102	79598	Spp1
ENSMUSG00000029380	up	2.2368	0	6557	6933	5742	7096	1577	1619	1420	1680	Cxcl1
ENSMUSG00000045294	up	2.4557	0	7619	8426	6612	7984	1577	1552	1491	1669	Insig1
ENSMUSG00000004267	up	1.4703	0	4463	4930	3767	4628	1812	1830	1717	1862	Eno2
ENSMUSG00000044786	up	1.6752	0	22221	24124	19230	24064	7917	8055	7373	8243	Zfp36
ENSMUSG00000025408	up	1.5818	0	3111	3311	2599	3143	1101	1114	1049	1317	Ddit3
ENSMUSG00000052837	up	1.3043	0	18534	20220	16568	19952	8676	8341	8120	9203	Junb
ENSMUSG00000031604	up	1.3144	0	11055	12382	9757	11909	4883	5158	4656	5746	Msmo1
ENSMUSG00000038508	up	1.4147	0	7141	7800	6552	7697	3262	3046	2838	3195	Gdf15
ENSMUSG00000032193	up	1.8262	0	8960	10057	8053	9453	2844	2939	2807	3006	Ldlr
ENSMUSG00000017390	up	1.3883	0	4119	4792	3720	4506	1799	1862	1749	1959	Aldoc
ENSMUSG00000025153	up	1.1509	0	14886	16730	13064	16021	7634	7738	7376	8000	Fasn
ENSMUSG00000000078	up	1.175	0	11203	11874	10207	12397	5590	5826	5327	6073	Klf6
ENSMUSG00000093930	up	1.5918	0	4975	5525	4371	5379	1861	1946	1769	1988	Hmgcs1
ENSMUSG00000021025	up	1.5852	0	8716	9506	8354	9046	3356	3356	3266	3416	Nfkbia
ENSMUSG00000001627	up	2.1041	0	15632	17154	14138	16696	4098	4055	3834	4710	Ifrd1
ENSMUSG00000022351	up	1.088	0	6306	6873	5471	6619	3344	3324	3062	3665	Sqle
ENSMUSG00000005125	up	1.4441	0	32264	35351	28655	35362	13465	13988	12645	14387	Ndrg1
ENSMUSG00000042622	up	1.2014	0	7224	7992	6931	7884	3648	3696	3378	4025	Maff
ENSMUSG00000035356	up	1.4943	0	5920	6559	5442	6625	2471	2423	2278	2648	Nfkbiz
ENSMUSG00000007038	up	1.2989	0	5773	6320	5002	5982	2686	2655	2376	2852	Neu1
ENSMUSG00000003541	up	1.2078	0	20928	23220	19757	23615	10531	10630	10160	11396	Ier3
ENSMUSG00000024190	up	2.1403	0	8519	10100	8657	9937	2380	2457	2188	2499	Dusp1
ENSMUSG00000038418	up	1.4751	0	15525	17551	14892	18093	6727	6908	6324	6805	Egr1
ENSMUSG00000031765	up	1.0513	1.427e-290	6301	6897	5777	6868	3553	3452	3314	3736	Mt1
ENSMUSG00000058258	up	2.0497	2.4651e-278	1784	1852	1414	1860	472	442	443	521	Idi1
ENSMUSG00000053581	up	1.0323	3.383e-269	5587	6317	4992	6016	2987	3192	3037	3398	Zfand2a
ENSMUSG00000054364	up	2.0259	4.654e-266	22581	25269	22788	25996	6764	6882	6406	6713	Rhob
ENSMUSG00000024378	up	1.27	8.1397e-258	3464	3625	2963	3744	1603	1567	1533	1740	Stard4
ENSMUSG00000021670	up	1.0684	6.4336e-254	8755	9385	7395	9765	4678	4629	4497	5133	Hmgcr
ENSMUSG00000021701	up	1.1445	1.6896e-249	10716	11967	10107	12674	5597	5840	5442	6304	Plk2
ENSMUSG00000040435	up	1.0954	3.3248e-242	8799	9809	7974	10248	4749	5025	4403	5242	Ppp1r15a
ENSMUSG00000021273	up	1.2713	1.7116e-234	4482	5102	3941	4652	2001	2126	2130	2212	Fdft1
ENSMUSG00000020190	up	1.0101	9.2522e-229	4742	5331	4283	5051	2551	2800	2555	2954	Mknk2
ENSMUSG00000112023	up	2.1674	6.7654e-227	1378	1611	1214	1660	359	395	319	395	Lilr4b
ENSMUSG00000034765	up	1.0124	2.9141e-215	5156	5692	4623	5804	2980	2960	2667	3281	Dusp5
ENSMUSG00000034926	up	1.3635	8.4572e-212	2230	2409	1865	2247	952	926	928	1022	Dhcr24
ENSMUSG00000024665	up	1.0688	3.2612e-207	3391	3581	2831	3497	1716	1836	1681	1907	Fads2
ENSMUSG00000003545	up	1.9896	1.8236e-206	3947	4474	4194	5255	1298	1302	1160	1320	Fosb
ENSMUSG00000043421	up	1.2323	2.2404e-203	2409	2600	2147	2667	1154	1164	1116	1277	Hilpda
ENSMUSG00000022893	up	1.6364	1.4992e-201	2795	2919	2560	3319	1055	1109	946	1094	Adamts1
ENSMUSG00000038067	up	1.9134	2.004e-198	1241	1395	1221	1356	380	416	359	407	Csf3
ENSMUSG00000033105	up	1.4499	1.0916e-193	2490	2650	1925	2525	1015	972	894	1066	Lss
ENSMUSG00000018916	up	1.995	3.3285e-189	1213	1327	1028	1338	361	375	283	367	Csf2
ENSMUSG00000047562	up	1.5224	6.7399e-165	3564	3708	2867	3977	1400	1421	1139	1578	Mmp10
ENSMUSG00000042682	up	1.0121	8.051e-162	4901	5393	4535	5509	2665	2768	2745	3195	Selenok
ENSMUSG00000030103	up	1.0392	3.4985e-158	3702	4185	3354	3897	2161	2124	1910	2099	Bhlhe40
ENSMUSG00000024014	up	1.0382	9.416e-144	3204	3486	2723	3574	1781	1682	1676	1979	Pim1
ENSMUSG00000025137	up	1.0411	5.0668e-139	2750	2978	2338	2935	1492	1602	1310	1619	Pcyt2
ENSMUSG00000023034	up	1.5369	2.0632e-134	1258	1403	1182	1476	510	482	522	550	Nr4a1
ENSMUSG00000027533	up	1.0128	2.2008e-132	2758	3117	2593	3013	1520	1693	1434	1775	Fabp5
ENSMUSG00000059743	up	2.5983	2.6151e-123	561	543	443	601	103	98	80	119	Fdps
ENSMUSG00000090610	up	2.1124	1.2414e-121	683	764	703	802	170	192	182	228	Gm3571
ENSMUSG00000052684	up	1.7014	2.275e-121	7995	9049	8427	10013	3189	3111	2761	3272	Jun
ENSMUSG00000031349	up	1.6113	2.9256e-113	1120	1249	987	1284	385	423	461	437	Nsdhl
ENSMUSG00000090582	up	2.948	2.2598e-112	724	601	490	673	71	114	85	93	Gm17024
ENSMUSG00000049723	up	2.9813	3.2526e-110	482	537	367	501	86	72	52	58	Mmp12
ENSMUSG00000014813	up	1.0423	6.5836e-101	2917	2976	2544	3230	1489	1546	1493	1867	Stc1
ENSMUSG00000024235	up	1.046	2.3324e-98	1457	1548	1238	1531	733	792	759	866	Map3k8
ENSMUSG00000006517	up	1.7642	2.9142e-98	962	1187	925	989	297	354	362	332	Mvd
ENSMUSG00000014905	up	1.1146	3.7869e-98	4049	4532	4120	5027	2300	2209	2115	2630	Dnajb9
ENSMUSG00000027952	up	1.3332	5.1691e-93	1487	1641	1261	1486	736	591	577	723	Pmvk
ENSMUSG00000071076	up	1.5422	2.072e-91	999	1223	1039	1172	440	410	446	417	Jund
ENSMUSG00000067203	up	1.2959	3.4073e-84	1103	1152	853	1024	496	468	439	490	H2-K2
ENSMUSG00000022237	up	1.061	8.3844e-84	1141	1293	1028	1275	659	625	574	700	Ankrd33b
ENSMUSG00000074489	up	1.7819	1.7593e-82	562	649	492	568	186	159	194	204	Bglap3
ENSMUSG00000112148	up	3.0068	1.9821e-82	299	309	253	277	40	37	31	52	Lilrb4a
ENSMUSG00000021250	up	1.2222	8.9118e-82	3074	3643	3378	4123	1708	1728	1641	1800	Fos
ENSMUSG00000023832	up	1.2754	1.2837e-81	1492	1687	1562	1663	734	831	658	769	Acat2
ENSMUSG00000010051	up	1.5291	6.264e-69	507	596	503	545	216	200	195	230	Hyal1
ENSMUSG00000032238	up	1.2307	1.767e-66	849	888	727	929	406	414	335	477	Rora
ENSMUSG00000026675	up	1.1126	5.2795e-64	1081	1068	886	1176	526	591	516	559	Hsd17b7
ENSMUSG00000015312	up	1.2947	1.1052e-63	785	796	705	782	388	318	324	382	Gadd45b
ENSMUSG00000029019	up	1.0654	5.7443e-63	1723	1831	1729	1859	1054	937	831	1041	Nppb
ENSMUSG00000060314	up	1.1059	1.9098e-55	1520	1708	1337	1904	820	771	772	1023	Zfp941
ENSMUSG00000037887	up	1.2641	7.9354e-52	593	664	513	573	266	252	285	295	Dusp8
ENSMUSG00000053560	up	1.1744	5.7133e-51	6199	7358	6776	7920	3662	3385	3332	3758	Ier2
ENSMUSG00000020423	up	1.1258	3.4583e-49	5567	6439	5928	7323	3223	3269	3068	3507	Btg2
ENSMUSG00000087006	up	1.1866	2.5394e-46	815	877	864	929	425	406	381	525	Gm13889
ENSMUSG00000079173	up	2.3667	2.1842e-38	270	266	168	199	42	60	52	42	Zan
ENSMUSG00000079334	up	1.0204	4.6163e-36	711	807	602	695	345	436	390	389	Naa80
ENSMUSG00000084899	up	1.8275	1.027e-34	213	231	160	225	77	63	60	62	Gm15344
ENSMUSG00000100009	up	1.8854	1.8146e-34	289	244	300	371	94	92	91	92	Gm7967
ENSMUSG00000026166	up	1.1445	2.1224e-33	498	578	514	480	239	267	260	293	Ccl20
ENSMUSG00000081094	up	1.075	2.0194e-30	590	742	638	654	306	334	380	385	Rpl19-ps11
ENSMUSG00000055148	up	1.465	3.9755e-30	220	246	225	247	101	101	80	102	Klf2
ENSMUSG00000029591	up	1.1603	1.7889e-29	440	495	405	388	225	237	199	211	Ung
ENSMUSG00000049649	up	1.2517	4.0162e-27	274	307	262	296	137	112	130	161	Gpr3
ENSMUSG00000061728	up	1.9241	1.3468e-26	155	155	122	187	42	56	45	40	Btnl7-ps
ENSMUSG00000065147	up	1.1873	4.8355e-26	256	282	249	294	136	136	115	149	Snora31
ENSMUSG00000008348	up	1.2234	1.6367e-25	12713	13998	13979	12470	6418	7119	6118	6149	Ubc
ENSMUSG00000030134	up	1.5267	3.0061e-25	226	224	152	241	83	79	67	100	Rasgef1a
ENSMUSG00000009654	up	1.1983	5.8279e-25	270	307	273	311	151	124	125	172	Oit3
ENSMUSG00000062515	up	1.0452	1.8104e-21	319	331	267	377	178	164	187	175	Fabp4
ENSMUSG00000064427	up	1.697	5.4884e-19	115	161	157	193	54	65	47	52	Gm22748
ENSMUSG00000007021	up	1.2559	3.1519e-18	222	329	187	242	122	112	117	107	Syngr3
ENSMUSG00000087528	up	1.3836	6.7803e-17	142	155	114	132	67	60	52	55	9830144P21Rik
ENSMUSG00000058542	up	1.015	2.3254e-16	218	221	179	235	130	110	112	123	Gm15590
ENSMUSG00000079138	up	2.1212	4.727e-15	62	69	59	72	20	11	15	22	Gm8818
ENSMUSG00000053158	up	2.2921	6.0975e-15	56	63	50	62	17	10	14	12	Fes
ENSMUSG00000116908	up	1.3103	2.1678e-14	219	213	178	229	124	113	64	80	Gm49599
ENSMUSG00000044244	up	1.235	1.3709e-13	119	124	107	141	52	60	59	64	Il20rb
ENSMUSG00000030303	up	1.4958	4.0943e-13	115	134	72	140	38	43	42	60	Far2
ENSMUSG00000038151	up	1.0986	1.2787e-12	138	151	113	145	80	72	67	68	Prdm1
ENSMUSG00000045322	up	1.2521	1.4765e-12	171	124	127	155	62	70	77	64	Tlr9
ENSMUSG00000058427	up	3.5299	2.8058e-12	44	32	40	26	4	5	3	2	Cxcl2
ENSMUSG00000108368	up	2.1553	2.9397e-12	49	50	39	56	11	14	11	13	Gm45053
ENSMUSG00000117050	up	1.1566	1.621e-11	124	188	126	127	77	62	67	79	1700023B13Rik
ENSMUSG00000022018	up	1.4803	1.9501e-11	100	138	124	82	41	40	42	58	Rgcc
ENSMUSG00000063535	up	1.3095	2.6533e-11	85	91	81	99	35	41	41	45	Zfp773
ENSMUSG00000045502	up	1.4179	2.6629e-11	92	97	65	84	38	42	30	32	Hcar2
ENSMUSG00000028575	up	2.2325	3.1839e-11	49	49	35	52	16	9	12	7	Eqtn
ENSMUSG00000026064	up	1.7257	3.5596e-11	73	72	69	94	18	41	23	23	Ptp4a1
ENSMUSG00000048827	up	1.0324	9.8844e-11	134	153	111	142	83	68	78	67	Pkd1l3
ENSMUSG00000044162	up	1.1785	1.2444e-10	109	119	116	118	50	58	45	79	Tnip3
ENSMUSG00000074577	up	1.2779	1.2562e-10	102	100	90	91	49	35	50	44	Ripor3
ENSMUSG00000097275	up	1.1993	1.3414e-10	99	100	89	99	46	55	45	44	Gm26648
ENSMUSG00000095526	up	1.0935	5.6438e-10	104	119	133	129	62	66	58	72	Gm10243
ENSMUSG00000027913	up	1.5233	5.6836e-10	65	77	62	71	19	38	22	29	Crct1
ENSMUSG00000043811	up	1.9541	7.241e-10	54	56	34	58	12	12	22	12	Rtn4r
ENSMUSG00000110588	up	1.2668	7.8282e-10	86	111	68	94	48	47	36	36	Gm45774
ENSMUSG00000027919	up	2.6526	1.3633e-09	31	23	38	41	7	6	7	4	Lce1g
ENSMUSG00000000489	up	1.0428	1.4021e-09	128	155	96	116	70	72	67	60	Pdgfb
ENSMUSG00000055030	up	1.5303	3.2363e-09	67	95	58	79	26	30	40	19	Sprr2e
ENSMUSG00000091412	up	1.4479	6.3709e-09	63	57	71	76	31	21	28	31	Gm2895
ENSMUSG00000049892	up	1.5193	1.2506e-08	60	93	47	112	24	29	33	35	Rasd1
ENSMUSG00000026532	up	2.8828	1.9455e-08	22	31	22	23	4	6	1	4	Spta1
ENSMUSG00000068120	up	2.3573	2.9925e-08	43	23	37	66	14	7	11	5	Gm10231
ENSMUSG00000036292	up	1.9283	4.1356e-08	48	65	23	39	11	13	14	13	Gramd1c
ENSMUSG00000093651	up	1.6051	4.8169e-08	65	65	67	50	35	13	22	22	Gm5873
ENSMUSG00000054412	up	1.8457	9.3467e-08	47	40	28	36	13	12	14	8	Gm4793
ENSMUSG00000117912	up	2.0114	1.5122e-07	25	35	27	35	10	6	9	9	Gm50383
ENSMUSG00000006378	up	1.2988	1.6854e-07	50	63	53	54	24	27	22	28	Gcat
ENSMUSG00000109953	up	1.2153	1.7799e-07	78	70	57	59	30	36	33	29	5430430B14Rik
ENSMUSG00000087445	up	1.2066	2.495e-07	120	176	71	107	74	49	40	66	Gm14286
ENSMUSG00000028341	up	1.1128	2.618e-07	86	82	59	76	40	43	42	32	Nr4a3
ENSMUSG00000065434	up	1.0072	3.0496e-07	99	84	80	120	49	64	45	57	Mir7-1
ENSMUSG00000064602	up	1.2424	3.2115e-07	62	60	59	74	38	24	23	37	Snora41
ENSMUSG00000109005	up	1.0451	3.3639e-07	102	79	85	100	42	42	52	65	Gm45221
ENSMUSG00000106751	up	1.5239	3.8095e-07	51	68	37	43	20	18	25	14	Gm42467
ENSMUSG00000038523	up	1.3619	4.9185e-07	63	60	67	85	36	31	36	17	1700003F12Rik
ENSMUSG00000071658	up	1.3792	6.4304e-07	92	56	50	56	21	32	31	26	Gng3
ENSMUSG00000090387	up	2.7294	7.1341e-07	33	22	32	18	10	1	5	2	Gm17056
ENSMUSG00000106928	up	1.1266	9.3429e-07	60	79	62	79	34	43	23	45	Gm43860
ENSMUSG00000028373	up	1.4473	1.9135e-06	40	53	32	40	16	22	12	18	Astn2
ENSMUSG00000087338	up	1.1502	1.9359e-06	90	79	53	61	30	31	44	38	Scpep1os
ENSMUSG00000077167	up	1.5008	2.4825e-06	45	36	32	37	17	13	11	19	Gm24119
ENSMUSG00000028328	up	1.1703	3.0988e-06	82	112	99	82	42	43	27	79	Tmod1
ENSMUSG00000082193	up	1.2747	9.6349e-06	51	37	57	75	30	24	25	24	Rpl5-ps1
ENSMUSG00000110702	up	1.89	9.8091e-06	19	29	26	25	9	8	9	4	Gm45767
ENSMUSG00000024621	up	1.1551	1.1416e-05	54	55	48	66	17	38	26	32	Csf1r
ENSMUSG00000069939	up	1.0224	1.2066e-05	456	882	415	833	334	347	370	355	Gm12070
ENSMUSG00000065904	up	1.1297	1.5477e-05	56	49	40	45	25	25	21	27	Gm26109
ENSMUSG00000034177	up	1.6141	1.7709e-05	24	46	26	37	11	9	8	21	Rnf43
ENSMUSG00000085289	up	1.2395	1.7856e-05	54	51	47	42	16	17	29	31	Gm15337
ENSMUSG00000098489	up	1.5985	2.2149e-05	23	29	22	31	10	9	9	11	Mir7678
ENSMUSG00000117772	up	1.7583	2.2954e-05	38	56	36	47	13	31	3	12	Gm50333
ENSMUSG00000104503	up	1.1538	3.1393e-05	61	63	33	56	18	36	26	27	Gm37738
ENSMUSG00000064281	up	1.1727	3.2761e-05	36	63	43	44	19	28	19	27	Rpl19-ps1
ENSMUSG00000109498	up	1.2052	4.206e-05	41	41	35	36	17	23	15	20	Gm45222
ENSMUSG00000035835	up	1.0563	4.4537e-05	71	62	78	98	33	28	56	51	Plppr3
ENSMUSG00000104347	up	1.5859	4.4658e-05	35	27	25	27	15	5	9	14	Gm37689
ENSMUSG00000071342	up	4.1203	4.8233e-05	18	13	8	7	1	0	0	2	Lsmem1
ENSMUSG00000086598	up	1.4865	6.5783e-05	28	30	25	42	12	20	10	8	Btbd18
ENSMUSG00000090559	up	1.5066	7.0701e-05	28	27	22	24	12	9	10	9	Gm17137
ENSMUSG00000046203	up	2.067	8.5144e-05	18	19	23	20	5	8	0	9	Sprr2g
ENSMUSG00000030793	up	1.5404	9.5456e-05	21	26	20	37	13	10	9	8	Pycard
ENSMUSG00000035458	up	1.3551	0.00011455	46	47	19	30	17	18	11	16	Tnni3
ENSMUSG00000070385	up	1.9281	0.00012309	15	25	15	16	5	3	5	8	Ampd1
ENSMUSG00000081404	up	1.805	0.00012346	22	19	16	23	6	8	2	10	Gm15694
ENSMUSG00000091017	up	5.0643	0.00013363	4	4	4	10	0	0	0	0	Fam71a
ENSMUSG00000090397	up	1.0698	0.00014637	46	40	45	48	26	29	14	28	Gm17096
ENSMUSG00000021303	up	1.2111	0.00015187	40	37	46	57	20	16	15	38	Gng4
ENSMUSG00000077549	up	2.1041	0.00015197	23	19	11	12	3	7	3	4	Snord71
ENSMUSG00000115976	up	1.0978	0.00016912	41	57	32	49	23	31	13	27	Gm31462
ENSMUSG00000114438	up	1.155	0.00017307	31	45	48	41	14	27	22	21	Gm47827
ENSMUSG00000086506	up	1.0929	0.00017721	32	55	38	38	18	25	20	23	Gm15911
ENSMUSG00000056270	up	1.8537	0.00017977	22	16	32	27	12	10	1	8	Prr9
ENSMUSG00000035129	up	1.1814	0.00018846	28	44	37	34	14	17	22	18	Gm6781
ENSMUSG00000108436	up	1.3833	0.00019525	43	35	21	38	19	6	13	21	Gm44851
ENSMUSG00000064390	up	1.1038	0.00020108	38	65	38	48	26	15	21	37	Snord73b
ENSMUSG00000104720	up	1.1639	0.00021724	71	59	28	36	28	26	18	25	Gm43138
ENSMUSG00000104677	up	5.1	0.00022547	7	12	2	2	0	0	0	0	Gm43376
ENSMUSG00000112168	up	2.0663	0.00023007	31	25	8	11	4	6	4	6	Gm34776
ENSMUSG00000095762	up	1.2983	0.00023004	24	34	22	32	11	11	15	14	Gm16378
ENSMUSG00000090105	up	1.7726	0.00024925	23	30	20	17	2	11	4	13	Gm15890
ENSMUSG00000106375	up	1.5173	0.0002576	18	21	25	24	10	8	6	11	Gm43361
ENSMUSG00000083287	up	1.5365	0.00028364	29	24	25	28	5	7	19	10	Idi1-ps1
ENSMUSG00000111777	up	1.4518	0.00032677	41	46	18	59	24	8	9	26	Gm47147
ENSMUSG00000022197	up	1.3037	0.00039684	24	33	44	29	22	13	13	12	Pdzd2
ENSMUSG00000089239	up	1.3041	0.0004252	24	31	21	23	12	10	12	11	Gm22200
ENSMUSG00000025723	up	1.7872	0.00043018	19	20	13	15	6	5	2	9	Nmb
ENSMUSG00000105201	up	1.3416	0.00043477	26	28	29	24	9	7	14	18	Gm43362
ENSMUSG00000112990	up	1.2886	0.00045533	40	44	22	42	14	29	7	18	Gm47372
ENSMUSG00000049719	up	2.4101	0.00052909	14	8	17	22	8	4	1	0	Prss46
ENSMUSG00000020900	up	1.4026	0.00054264	33	37	15	29	18	15	6	9	Myh10
ENSMUSG00000105140	up	1.4378	0.00057482	19	25	28	18	7	11	7	13	Gm43127
ENSMUSG00000065036	up	1.5433	0.0005791	36	14	17	29	8	7	13	9	Gm22362
ENSMUSG00000086816	up	4.7484	0.00065297	3	8	2	5	0	0	0	0	Gm16726
ENSMUSG00000042216	up	1.075	0.00066559	35	33	26	33	14	15	17	22	Sgsm1
ENSMUSG00000109787	up	1.6141	0.00070931	29	14	20	18	5	12	8	5	Gm45286
ENSMUSG00000090194	up	1.1411	0.00072896	25	38	22	33	12	14	15	19	Gm16161
ENSMUSG00000106188	up	1.7643	0.00075611	13	28	11	18	2	6	6	9	Gm9710
ENSMUSG00000108991	up	3.3219	0.00077311	11	15	6	4	0	3	1	0	Gm45807
ENSMUSG00000056412	up	1.2276	0.00080018	28	35	15	29	11	13	12	15	Psenen-ps
ENSMUSG00000102570	up	1.3366	0.00081502	26	42	36	48	9	12	11	37	Gm37968
ENSMUSG00000116778	up	1.6552	0.00082393	20	42	10	17	6	6	11	8	Gm49713
ENSMUSG00000022044	up	3.2564	0.00083213	6	5	9	14	0	2	2	0	Stmn4
ENSMUSG00000112636	up	2.0732	0.0009633	12	19	15	10	0	7	5	3	Gm47223
ENSMUSG00000110916	up	2.3342	0.00098631	17	6	13	8	4	2	2	2	2310003N18Rik
ENSMUSG00000110088	up	1.4993	0.00099804	19	29	11	20	5	8	10	8	Gm45343
ENSMUSG00000015452	up	1.3671	0.0010805	34	24	48	29	22	12	5	22	Ager
ENSMUSG00000067058	up	1.1893	0.0012728	24	32	19	25	13	9	15	12	Rps15a-ps5
ENSMUSG00000109198	up	1.1588	0.0013039	33	38	28	23	11	23	9	19	D7Bwg0826e
ENSMUSG00000069718	up	1.5829	0.0014747	13	15	14	19	5	8	4	6	Gm11563
ENSMUSG00000093766	up	4.2684	0.0018633	4	1	9	6	0	0	0	1	Gm20679
ENSMUSG00000070448	up	4.1603	0.0018742	2	6	7	4	0	0	0	1	Vmn2r89
ENSMUSG00000092495	up	1.609	0.0018861	29	25	7	22	14	5	6	5	Gm20405
ENSMUSG00000022617	up	1.0072	0.0019675	29	36	33	26	18	13	16	23	Chkb
ENSMUSG00000077148	up	1.8459	0.0019832	17	21	9	8	2	4	7	4	Gm22935
ENSMUSG00000114212	up	4.7519	0.0019906	7	0	6	4	0	0	0	0	Gm47985
ENSMUSG00000116604	up	1.4847	0.0020071	14	16	26	24	4	10	5	14	Gm49745
ENSMUSG00000102258	up	2.0713	0.0020302	11	12	6	20	0	4	4	5	Gm38257
ENSMUSG00000106946	up	3.2851	0.0025769	16	16	2	2	2	0	2	0	Gm42856
ENSMUSG00000029360	up	1.1156	0.0026715	26	37	18	30	8	13	20	16	Gm9754
ENSMUSG00000114934	up	2.7259	0.0027057	6	11	4	9	2	2	1	0	Gm48342
ENSMUSG00000105776	up	1.2361	0.0027101	25	26	11	27	14	10	9	9	Gm43292
ENSMUSG00000103404	up	3.7683	0.0027258	6	4	7	7	0	0	2	0	Gm37932
ENSMUSG00000047242	up	1.0554	0.002749	30	34	18	24	13	16	15	13	Taf9b
ENSMUSG00000027505	up	1.3722	0.0028027	14	15	24	22	6	12	8	7	Fam209
ENSMUSG00000086554	up	1.4702	0.0028513	15	19	16	14	11	6	5	4	9530034E10Rik
ENSMUSG00000048153	up	2.3973	0.0029523	10	11	6	10	0	3	0	5	Olfr49
ENSMUSG00000107094	up	1.4512	0.0029843	18	14	10	19	7	6	6	6	Gm43294
ENSMUSG00000110575	up	1.4659	0.0029877	18	19	22	11	7	3	8	11	6330537M06Rik
ENSMUSG00000104467	up	1.5804	0.0035908	20	15	16	7	6	6	6	4	Gm37660
ENSMUSG00000038128	up	4.5253	0.0040035	0	6	5	4	0	0	0	0	Camk4
ENSMUSG00000044122	up	1.3294	0.0045746	22	19	14	22	7	5	16	6	Proca1
ENSMUSG00000065778	up	4.0276	0.0046633	1	2	8	6	1	0	0	0	Gm22154
ENSMUSG00000098068	up	4.2746	0.0048399	3	6	1	3	0	0	0	0	Gm7909
ENSMUSG00000102964	up	1.4123	0.0048874	18	30	20	29	15	8	16	1	9430034N14Rik
ENSMUSG00000037477	up	3.8849	0.0048869	2	7	4	3	0	1	0	0	Tbx10
ENSMUSG00000102461	up	1.8475	0.004971	11	10	12	15	6	7	2	0	Gm37166
ENSMUSG00000062082	up	4.2208	0.0050307	2	2	4	4	0	0	0	0	Cd200r4
ENSMUSG00000044364	up	1.0828	0.0052079	21	17	31	29	14	15	9	15	Tmem74b
ENSMUSG00000079421	up	4.1974	0.0055093	5	3	2	2	0	0	0	0	4930402F06Rik
ENSMUSG00000086121	up	1.3715	0.0063577	23	19	10	13	4	10	9	5	Gm16068
ENSMUSG00000030109	up	1.0992	0.0063889	24	19	14	23	8	12	10	12	Slc6a12
ENSMUSG00000078240	up	1.2288	0.0066014	14	20	20	19	9	12	10	4	Gm3550
ENSMUSG00000070891	up	2.1292	0.0066738	18	6	4	11	0	2	4	4	Gm12689
ENSMUSG00000115718	up	1.0976	0.0066945	30	40	12	34	13	25	10	12	Gm49179
ENSMUSG00000035394	up	4.1782	0.0068855	4	2	1	5	0	0	0	0	Cfap53
ENSMUSG00000018930	up	2.1916	0.0072631	13	10	4	6	2	4	2	0	Ccl4
ENSMUSG00000111390	up	1.5401	0.0074138	7	18	14	10	6	3	5	5	Gm48796
ENSMUSG00000090207	up	1.3279	0.0077193	9	32	17	19	13	9	8	4	4930524O07Rik
ENSMUSG00000103966	up	1.1615	0.0077553	30	25	17	30	8	16	4	24	Gm37120
ENSMUSG00000100833	up	1.1318	0.0077579	28	25	14	26	15	10	4	19	Gm28988
ENSMUSG00000107079	up	3.72	0.0079506	2	4	5	3	0	1	0	0	Gm35648
ENSMUSG00000089371	up	2.6815	0.0079755	4	8	4	7	0	2	1	1	Mir1938
ENSMUSG00000078502	up	1.4628	0.0081652	19	16	13	12	4	8	1	12	Zfp268
ENSMUSG00000092286	up	1.1487	0.0082972	54	33	22	30	31	16	4	20	Dtnbos
ENSMUSG00000081382	up	1.7133	0.0083549	11	17	5	23	8	5	0	6	Rpl18-ps1
ENSMUSG00000015134	up	1.449	0.0091304	8	13	15	12	4	7	4	5	Aldh1a3
ENSMUSG00000072844	up	2.385	0.009182	12	3	5	8	3	1	2	0	G530011O06Rik
ENSMUSG00000110633	up	1.1899	0.0094778	23	34	10	13	8	10	9	12	Gm32122
ENSMUSG00000087373	up	1.218	0.0095639	9	17	20	22	10	7	9	7	Gm15892
ENSMUSG00000111967	up	4.2751	0.0097559	0	6	2	5	0	0	0	0	Gm3678
ENSMUSG00000028427	up	2.027	0.010032	11	3	10	11	2	3	0	5	Aqp7
ENSMUSG00000029343	up	3.39	0.010311	3	7	3	6	0	0	2	0	Crybb1
ENSMUSG00000020234	up	1.2533	0.010354	20	16	10	16	11	7	7	4	4930404N11Rik
ENSMUSG00000098470	up	2.7983	0.010382	1	56	41	6	5	2	5	5	C1rb
ENSMUSG00000113571	up	1.5673	0.010662	6	19	11	14	8	2	2	7	Gm48137
ENSMUSG00000021136	up	4.2699	0.010673	4	2	6	0	0	0	0	0	Smoc1
ENSMUSG00000091160	up	3.6901	0.010997	6	5	2	1	1	0	0	0	Gm17133
ENSMUSG00002076280	up	3.9718	0.011736	2	2	4	2	0	0	0	0	-
ENSMUSG00000081974	up	1.2829	0.011814	14	14	27	20	15	7	10	3	Gm11960
ENSMUSG00000042157	up	3.4886	0.011876	12	2	2	4	0	2	0	0	Sprr2i
ENSMUSG00000109485	up	1.2004	0.01189	16	18	14	11	6	10	6	7	Gm45016
ENSMUSG00000111160	up	3.3653	0.012137	6	4	6	2	0	2	0	0	Gm48855
ENSMUSG00000103303	up	2.5815	0.012321	6	3	5	7	1	0	1	2	Gm37802
ENSMUSG00000090489	up	1.1467	0.012334	13	16	17	21	6	7	13	8	Gm17415
ENSMUSG00000025735	up	1.0971	0.012358	18	14	18	18	9	6	11	10	Rhbdl1
ENSMUSG00000110627	up	1.0127	0.012672	23	24	11	31	17	10	11	11	Gm18935
ENSMUSG00000037418	up	2.0368	0.012784	6	5	7	15	4	4	1	0	Best1
ENSMUSG00000106028	up	1.3396	0.012984	18	13	21	9	3	6	6	13	Gm8493
ENSMUSG00000084252	up	1.6727	0.013127	8	11	7	11	2	7	2	2	Gm12036
ENSMUSG00000074896	down	-1.6868	3.1673e-280	728	807	683	854	2656	2755	2686	3047	Ifit3
ENSMUSG00000002289	down	-1.1453	1.6726e-156	1144	1330	1146	1311	3105	3003	2852	3344	Angptl4
ENSMUSG00000069874	down	-1.0042	2.6225e-108	1050	1120	895	1006	2243	2222	2193	2547	Irgm2
ENSMUSG00000040035	down	-1.1933	8.0521e-95	517	576	419	542	1339	1320	1256	1365	Disp2
ENSMUSG00000062488	down	-1.6528	4.2157e-92	268	254	249	318	1000	905	907	1052	Ifit3b
ENSMUSG00000034459	down	-1.2898	1.4047e-89	538	518	497	531	1350	1395	1415	1597	Ifit1
ENSMUSG00000054072	down	-1.4304	1.737e-72	260	286	254	299	801	794	762	990	Iigp1
ENSMUSG00000043263	down	-1.3602	1.3059e-67	232	283	202	281	709	715	688	768	Ifi209
ENSMUSG00000020638	down	-1.043	3.8805e-60	455	478	370	463	1015	1077	961	1041	Cmpk2
ENSMUSG00000027514	down	-1.0952	2.5472e-59	445	467	342	492	1003	1048	950	1199	Zbp1
ENSMUSG00000017446	down	-1.0429	3.1856e-59	540	529	487	538	1215	1305	1069	1285	C1qtnf1
ENSMUSG00000044734	down	-1.743	2.3119e-43	89	115	72	102	360	308	350	403	Serpinb1a
ENSMUSG00000031639	down	-1.1617	4.502e-40	295	312	225	347	759	805	630	771	Tlr3
ENSMUSG00000103839	down	-1.6259	2.9707e-31	85	113	61	95	287	296	262	384	Gm37607
ENSMUSG00000024579	down	-1.0463	4.1646e-31	344	404	317	277	750	794	725	861	Pcyox1l
ENSMUSG00000074415	down	-1.025	6.4358e-31	785	779	488	598	1452	1613	1343	1651	Mir100hg
ENSMUSG00000035208	down	-1.0077	6.3906e-29	345	315	245	273	610	660	636	766	Slfn8
ENSMUSG00000025262	down	-1.231	1.4173e-28	150	146	114	189	393	410	350	429	Fam120c
ENSMUSG00000046295	down	-1.1074	5.9933e-28	148	165	154	161	393	375	347	413	Ankle1
ENSMUSG00000053965	down	-1.151	1.2807e-27	161	147	138	172	348	388	376	437	Pde5a
ENSMUSG00000087060	down	-1.5944	1.2813e-26	53	79	70	69	205	239	231	248	Eldr
ENSMUSG00000060441	down	-1.0972	2.4968e-26	140	147	123	152	327	339	320	369	Trim5
ENSMUSG00000025766	down	-1.268	1.1446e-25	100	141	107	127	296	298	324	370	D3Ertd751e
ENSMUSG00000054640	down	-1.1364	2.2381e-24	200	171	121	165	399	419	353	456	Slc8a1
ENSMUSG00000096687	down	-1.0083	3.8018e-23	199	225	207	187	508	450	414	488	Mfsd4b4
ENSMUSG00000073555	down	-1.6174	2.5435e-22	62	50	45	57	204	160	167	210	Gm4951
ENSMUSG00000031906	down	-1.1075	8.5876e-22	153	134	122	134	302	312	321	387	Smpd3
ENSMUSG00000017737	down	-1.045	1.9569e-20	169	135	125	152	343	320	326	363	Mmp9
ENSMUSG00000036356	down	-1.0216	7.8313e-20	161	169	168	172	379	332	394	432	Csgalnact1
ENSMUSG00000078921	down	-1.1871	4.0521e-19	89	111	88	82	231	222	233	264	Tgtp2
ENSMUSG00000033111	down	-1.0082	1.0991e-17	117	151	116	172	294	311	292	362	3830406C13Rik
ENSMUSG00000118590	down	-1.1107	6.629e-17	101	117	68	106	236	256	218	239	Gm15433
ENSMUSG00000050035	down	-1.7889	5.2038e-16	24	36	34	42	144	139	89	161	Fhl4
ENSMUSG00000036298	down	-1.6304	7.8625e-15	26	38	32	40	117	136	88	135	Slc2a13
ENSMUSG00000072915	down	-1.2203	9.9574e-15	75	77	52	66	194	177	140	198	Gm12258
ENSMUSG00000015243	down	-1.5628	1.1266e-14	33	33	32	54	108	134	122	142	Abca1
ENSMUSG00000054057	down	-1.0323	2.8481e-14	98	137	115	109	248	270	284	254	A930004D18Rik
ENSMUSG00000085675	down	-1.4163	6.3794e-14	36	43	33	56	114	135	120	135	Gm12022
ENSMUSG00000107215	down	-1.196	8.8147e-14	84	63	69	69	185	209	150	196	Gm43197
ENSMUSG00000048852	down	-1.5281	2.9434e-13	30	46	32	66	117	151	134	161	Gm12185
ENSMUSG00000022103	down	-1.2552	7.9745e-13	46	59	40	56	124	134	144	136	Gfra2
ENSMUSG00000050796	down	-1.044	1.4676e-12	68	78	74	73	170	162	157	194	B3galt6
ENSMUSG00000086725	down	-1.1044	2.8874e-12	64	73	54	58	154	138	144	167	A630052C17Rik
ENSMUSG00000005583	down	-1.0589	5.2794e-12	83	79	50	70	161	166	157	176	Mef2c
ENSMUSG00000114025	down	-1.0732	6.2392e-12	68	78	63	99	188	171	152	220	Gm49331
ENSMUSG00000078922	down	-1.7949	1.0512e-11	40	23	20	17	82	92	89	131	Tgtp1
ENSMUSG00000110148	down	-1.0578	2.8297e-11	113	114	62	89	217	225	171	273	5830408C22Rik
ENSMUSG00000052676	down	-1.9276	6.2976e-11	26	16	18	10	74	79	54	97	Zmat1
ENSMUSG00000045775	down	-1.7432	6.6031e-11	24	20	12	29	70	102	69	78	Slc16a5
ENSMUSG00000091764	down	-1.183	9.392e-11	44	50	46	44	102	126	113	131	Zfp964
ENSMUSG00000105096	down	-1.4221	1.6405e-10	31	37	26	30	107	73	88	106	Gbp10
ENSMUSG00000100594	down	-1.2489	1.975e-10	44	42	48	33	109	114	107	120	2810414N06Rik
ENSMUSG00000089940	down	-1.0833	4.8477e-10	63	66	60	64	167	146	109	186	Gm4117
ENSMUSG00000037621	down	-1.0651	5.965e-10	51	68	43	64	135	141	107	149	Atoh8
ENSMUSG00000025475	down	-1.335	6.0949e-10	38	38	19	49	102	100	98	106	Adgra1
ENSMUSG00000085054	down	-1.2869	6.7339e-10	53	40	38	29	114	116	104	107	Gm15834
ENSMUSG00000086502	down	-1.6585	9.2577e-10	15	19	21	23	71	78	71	57	B130055M24Rik
ENSMUSG00000039304	down	-1.2748	1.2785e-09	52	43	37	35	140	117	91	108	Tnfsf10
ENSMUSG00000084910	down	-1.8485	2.1056e-09	17	16	14	7	54	53	52	61	C630043F03Rik
ENSMUSG00000097534	down	-1.1765	3.088e-09	45	46	47	49	129	89	127	132	Gm16675
ENSMUSG00000024421	down	-1.0826	7.385e-09	50	59	46	51	113	137	91	153	Lama3
ENSMUSG00000042115	down	-1.0962	9.8975e-09	44	49	38	73	128	125	115	121	Klhdc8a
ENSMUSG00000116249	down	-1.8685	1.2748e-08	14	12	7	12	40	50	41	54	Gm49484
ENSMUSG00000049420	down	-1.2737	1.5391e-08	24	33	26	41	78	80	76	104	Tmem200a
ENSMUSG00000025328	down	-1.0399	2.0843e-08	68	59	38	67	148	146	121	119	Padi3
ENSMUSG00000082292	down	-2.11	3.7156e-08	6	19	3	11	46	40	51	49	Gm12250
ENSMUSG00000075318	down	-1.0804	3.7399e-08	39	56	45	47	97	134	90	126	Scn2a
ENSMUSG00000097108	down	-1.5864	4.1763e-08	22	22	12	16	52	52	55	85	Gm26581
ENSMUSG00000026288	down	-1.0915	4.982e-08	45	67	34	53	98	119	136	120	Inpp5d
ENSMUSG00000097187	down	-1.3996	5.3865e-08	20	30	16	22	57	64	70	69	Gm19426
ENSMUSG00000074052	down	-2.2627	8.0508e-08	5	5	6	8	29	39	29	33	BC048644
ENSMUSG00000074006	down	-1.1912	9.9618e-08	32	33	25	45	92	79	93	81	Omp
ENSMUSG00000056481	down	-1.0239	1.2206e-07	38	65	39	61	105	107	124	126	Cd248
ENSMUSG00000018740	down	-1.1315	1.2748e-07	33	61	38	48	97	91	108	148	Slc25a35
ENSMUSG00000034112	down	-1.1833	1.4231e-07	37	27	24	33	78	73	71	88	Atp2c2
ENSMUSG00000037892	down	-1.6209	1.4348e-07	20	19	12	16	46	51	78	55	Pcdh18
ENSMUSG00000030616	down	-1.5124	1.4828e-07	12	32	22	16	56	76	58	74	Sytl2
ENSMUSG00000100967	down	-1.2294	2.4208e-07	30	35	19	29	60	85	74	78	Gm29666
ENSMUSG00000097365	down	-1.3446	2.6089e-07	23	29	25	16	62	57	70	78	C030034L19Rik
ENSMUSG00000044703	down	-1.8112	2.7099e-07	17	13	9	6	46	42	34	57	Phf11a
ENSMUSG00000068231	down	-1.0532	5.0475e-07	30	43	35	52	82	106	83	103	Vmn1r43
ENSMUSG00000052087	down	-1.6731	5.0856e-07	8	12	12	16	48	38	36	51	Rgs14
ENSMUSG00000022032	down	-1.3332	6.5203e-07	29	21	15	34	77	58	57	89	Scara5
ENSMUSG00000026564	down	-1.7257	7.1396e-07	8	14	8	12	45	36	33	42	Dusp27
ENSMUSG00000085196	down	-1.4469	7.7473e-07	25	18	13	20	64	40	60	69	Gm14963
ENSMUSG00000106317	down	-1.8963	9.8787e-07	7	9	8	7	29	34	34	33	Gm43848
ENSMUSG00000079457	down	-1.2065	1.0785e-06	22	44	29	28	88	62	71	99	Gm7609
ENSMUSG00000005611	down	-1.5073	1.1815e-06	20	11	14	15	44	41	51	57	Irag1
ENSMUSG00000097729	down	-1.3916	1.2818e-06	16	43	16	20	66	77	69	65	2310015A10Rik
ENSMUSG00000100658	down	-1.3574	1.4557e-06	14	29	29	19	62	70	73	58	F730311O21Rik
ENSMUSG00000033295	down	-1.0022	1.4945e-06	46	47	37	46	82	130	88	97	Ptprf
ENSMUSG00000040121	down	-1.8153	1.6618e-06	7	9	8	9	34	29	31	37	Rep15
ENSMUSG00000113165	down	-1.1728	1.8139e-06	30	32	20	32	66	93	65	64	Gm47863
ENSMUSG00000110419	down	-1.3537	1.9662e-06	26	23	15	15	44	59	53	72	AW046200
ENSMUSG00000061751	down	-1.0143	2.1405e-06	52	50	26	45	77	101	106	107	Kalrn
ENSMUSG00000097616	down	-1.1911	2.2046e-06	33	34	44	22	73	83	77	115	1110019D14Rik
ENSMUSG00000038732	down	-1.0347	2.4065e-06	46	33	32	52	75	111	93	97	Mboat1
ENSMUSG00000022309	down	-1.5368	3.4383e-06	10	20	10	19	39	51	35	68	Angpt1
ENSMUSG00000040189	down	-1.0771	3.4635e-06	38	37	23	47	97	93	59	95	Odad1
ENSMUSG00000094103	down	-3.2661	3.7569e-06	8	13	24	18	275	296	51	76	Fam177a2
ENSMUSG00000041607	down	-1.504	5.5112e-06	21	33	8	11	50	67	54	59	Mbp
ENSMUSG00000075010	down	-1.0302	6.0728e-06	44	27	28	47	86	73	83	94	AW112010
ENSMUSG00000097073	down	-2.1114	6.3391e-06	7	3	6	5	20	24	28	31	9430037G07Rik
ENSMUSG00000091199	down	-1.3318	6.8294e-06	30	42	33	24	56	64	112	136	Gm2619
ENSMUSG00000103115	down	-1.5044	7.2982e-06	14	13	15	12	44	58	29	43	Gm37584
ENSMUSG00000097343	down	-1.2464	8.1997e-06	16	30	16	21	48	60	60	52	9030407P20Rik
ENSMUSG00000060176	down	-1.1523	8.6926e-06	22	25	17	26	51	51	56	67	Kif27
ENSMUSG00000086755	down	-1.0603	9.1282e-06	27	41	20	28	70	62	64	75	Gm11216
ENSMUSG00000085316	down	-1.0386	9.6475e-06	27	41	40	40	67	76	102	98	D330050G23Rik
ENSMUSG00000104684	down	-1.8519	9.865e-06	8	10	7	4	26	38	26	28	5430427N15Rik
ENSMUSG00000047146	down	-1.4037	1.1174e-05	18	22	18	8	48	41	56	52	Tet1
ENSMUSG00000028621	down	-1.0056	1.2379e-05	56	39	30	43	94	99	109	75	Cyb5rl
ENSMUSG00000106951	down	-1.0271	1.3915e-05	31	37	27	48	65	94	64	106	5930430L01Rik
ENSMUSG00000073821	down	-1.1864	1.5328e-05	15	27	23	27	74	51	49	62	8030451A03Rik
ENSMUSG00000117333	down	-1.48	1.6246e-05	15	18	10	10	30	51	33	53	Gm16386
ENSMUSG00000087222	down	-1.2883	1.7509e-05	28	35	31	11	52	78	72	90	E030042O20Rik
ENSMUSG00000117893	down	-1.4094	1.8094e-05	12	11	20	15	40	37	42	57	Gm46658
ENSMUSG00000067297	down	-1.4438	1.9247e-05	14	23	10	13	32	51	36	65	Ifit1bl2
ENSMUSG00000111189	down	-1.4723	1.9487e-05	16	13	10	10	46	29	38	40	Gm48293
ENSMUSG00000051076	down	-1.3326	2.11e-05	20	12	12	16	43	41	45	41	Vtcn1
ENSMUSG00000073598	down	-1.274	2.3085e-05	15	18	16	14	45	47	37	43	1700066B19Rik
ENSMUSG00000068606	down	-1.3832	2.3175e-05	21	12	17	12	40	61	37	46	Gm4841
ENSMUSG00000116494	down	-5.3342	2.3649e-05	0	0	0	0	9	4	6	15	Gm49449
ENSMUSG00000108465	down	-1.3975	2.5149e-05	10	11	13	23	40	38	45	46	Gm45110
ENSMUSG00000005980	down	-1.08	2.552e-05	25	36	25	24	67	47	67	81	Dnase1
ENSMUSG00000115902	down	-1.495	2.928e-05	11	14	27	9	52	44	55	46	D730005E14Rik
ENSMUSG00000056492	down	-2.3535	2.9358e-05	1	8	2	4	20	23	14	29	Adgrf5
ENSMUSG00000024600	down	-1.0585	2.9516e-05	18	32	22	27	54	59	54	65	Slc27a6
ENSMUSG00000028064	down	-1.2453	3.4604e-05	23	25	10	26	71	48	39	65	Sema4a
ENSMUSG00000022583	down	-1.6242	3.7197e-05	8	7	8	12	33	27	35	26	Ly6f
ENSMUSG00000109780	down	-1.298	3.7341e-05	11	21	12	19	35	52	38	49	Gm45447
ENSMUSG00000025170	down	-1.2883	4.0913e-05	20	13	16	12	38	40	42	49	Rab40b
ENSMUSG00000089857	down	-1.253	4.1741e-05	16	18	10	24	52	46	42	41	Zfp882
ENSMUSG00000058163	down	-1.2277	4.9023e-05	13	23	13	35	46	56	53	65	Gm5431
ENSMUSG00000066867	down	-1.2573	5.4162e-05	15	17	11	24	37	42	53	47	Oas1e
ENSMUSG00000105419	down	-2.1118	5.4422e-05	4	8	4	2	21	29	21	16	Gm43205
ENSMUSG00000074452	down	-1.5278	6.9708e-05	11	10	8	11	41	34	32	22	Pate2
ENSMUSG00000040740	down	-1.2157	7.1611e-05	16	21	14	23	51	61	45	35	Slc25a34
ENSMUSG00000029082	down	-1.4861	7.2864e-05	10	13	11	8	22	41	33	37	Bst1
ENSMUSG00000051359	down	-2.3982	7.896e-05	2	5	2	3	11	26	15	19	Ncald
ENSMUSG00000086924	down	-1.1719	9.2046e-05	13	22	26	16	43	47	52	55	Gm11766
ENSMUSG00000090942	down	-1.1617	9.5076e-05	31	17	14	26	57	54	38	74	F830016B08Rik
ENSMUSG00000073236	down	-1.0084	0.00010133	28	23	24	27	56	48	68	59	2500004C02Rik
ENSMUSG00000046709	down	-1.0329	0.00010854	17	36	36	28	65	62	78	65	Mapk10
ENSMUSG00000055782	down	-1.2359	0.00011274	16	20	11	23	53	59	37	35	Abcd2
ENSMUSG00000103574	down	-1.5397	0.00012312	5	9	8	11	28	25	26	29	Gm37116
ENSMUSG00000113965	down	-1.4727	0.0001233	15	19	8	5	40	33	27	47	A730091E23Rik
ENSMUSG00000060131	down	-1.7982	0.00013157	6	2	8	10	17	28	27	31	Atp8b4
ENSMUSG00000078887	down	-1.0514	0.00013404	47	40	38	43	155	78	55	107	Gm6710
ENSMUSG00000000958	down	-1.1174	0.00013851	20	16	18	17	47	46	40	41	Slc7a7
ENSMUSG00000078141	down	-1.1916	0.00014887	16	18	15	15	39	35	51	39	Gm2399
ENSMUSG00000027790	down	-1.1163	0.00015223	22	18	15	22	39	55	35	60	Sis
ENSMUSG00000028197	down	-1.1464	0.00015346	31	22	9	24	53	45	60	54	Col24a1
ENSMUSG00000074281	down	-1.5405	0.00015588	24	6	4	22	46	50	41	45	Gm12522
ENSMUSG00000110618	down	-1.8181	0.00015636	6	5	6	17	53	16	32	33	Gm39822
ENSMUSG00000106157	down	-1.0153	0.00016389	25	25	20	21	41	59	55	52	4930555A03Rik
ENSMUSG00000104116	down	-1.2045	0.0001659	19	20	16	11	52	44	41	34	Gm37296
ENSMUSG00000071636	down	-4.6592	0.0001788	1	0	0	0	8	8	14	4	Rimbp3
ENSMUSG00000021091	down	-2.7004	0.00020171	2	2	2	2	12	6	17	24	Serpina3n
ENSMUSG00000025083	down	-1.1986	0.00022428	24	14	16	12	39	55	34	44	Afap1l2
ENSMUSG00000039508	down	-1.1219	0.00026127	14	15	19	16	39	39	36	44	Calhm4
ENSMUSG00000103041	down	-1.1329	0.00026709	19	44	15	29	51	95	58	56	Gm37305
ENSMUSG00000022938	down	-1.2353	0.00027496	14	15	13	13	38	28	29	52	Fam3b
ENSMUSG00000032572	down	-1.0566	0.00028513	17	16	24	21	41	45	49	49	Col6a4
ENSMUSG00000116114	down	-2.6763	0.00029418	3	6	0	0	16	21	17	9	Gm35853
ENSMUSG00000085628	down	-1.0852	0.00030113	23	15	37	27	74	55	48	72	Appbp2os
ENSMUSG00000102353	down	-1.0224	0.00030218	61	33	16	55	90	99	70	117	Gm38345
ENSMUSG00000028011	down	-1.8349	0.0003023	5	6	4	4	15	17	24	20	Tdo2
ENSMUSG00000109167	down	-1.2826	0.00031669	20	16	6	14	30	50	37	35	Gm44652
ENSMUSG00000020639	down	-1.215	0.00031845	9	14	14	18	41	29	34	40	Pfn4
ENSMUSG00000027636	down	-1.2127	0.00032437	15	14	14	10	41	34	29	35	Sla2
ENSMUSG00000111504	down	-1.0061	0.00033499	22	17	16	29	49	48	42	51	Gm48284
ENSMUSG00000032679	down	-1.5449	0.00034302	8	9	4	9	25	17	26	30	Cd59a
ENSMUSG00000052749	down	-1.6978	0.00035438	10	10	6	2	31	29	14	29	Trim30b
ENSMUSG00000071392	down	-1.8123	0.0003724	4	5	3	7	15	23	16	21	Ect2l
ENSMUSG00000086534	down	-1.3149	0.00037381	11	19	7	15	47	30	23	45	Gm16758
ENSMUSG00000025279	down	-1.2386	0.00037948	13	12	16	19	49	48	22	42	Dnase1l3
ENSMUSG00000040380	down	-1.0795	0.00038393	40	26	15	21	78	48	44	73	Cbln3
ENSMUSG00000115057	down	-3.0602	0.00040879	0	3	0	2	9	16	12	9	Gm8705
ENSMUSG00000070806	down	-1.287	0.00042447	8	17	8	14	26	30	37	35	Zmynd12
ENSMUSG00000118591	down	-1.0694	0.00045818	19	17	32	16	51	56	44	51	Gm52955
ENSMUSG00000048337	down	-1.7173	0.0004716	14	14	0	6	36	27	22	39	Npy4r
ENSMUSG00000111905	down	-4.6635	0.00052966	0	0	0	0	8	5	4	4	Gm48045
ENSMUSG00000113078	down	-2.7029	0.00053428	0	7	0	1	11	14	16	16	Gm48734
ENSMUSG00000028864	down	-1.7836	0.00065422	8	6	2	4	12	24	21	20	Hgf
ENSMUSG00000054945	down	-1.4462	0.00065594	4	20	6	10	37	28	25	31	Gm9958
ENSMUSG00000101037	down	-1.3818	0.00068535	8	6	8	12	23	23	26	28	Gm28424
ENSMUSG00000038347	down	-1.1422	0.00068931	20	19	10	16	46	26	48	40	Tcte2
ENSMUSG00000097174	down	-1.2177	0.00069591	11	16	7	15	33	25	36	33	Gm4890
ENSMUSG00000112716	down	-1.1156	0.00074302	30	18	9	23	40	38	47	70	4930471E19Rik
ENSMUSG00000020461	down	-1.3882	0.0007518	10	11	7	6	25	19	28	28	Clhc1
ENSMUSG00000109684	down	-1.0427	0.0007794	20	20	16	12	43	44	34	37	Gm45745
ENSMUSG00000054266	down	-3.2156	0.00079878	2	2	0	0	10	14	4	14	Serpinb9d
ENSMUSG00000071550	down	-4.2584	0.00083597	0	1	0	0	4	8	9	5	Cfap44
ENSMUSG00000099722	down	-1.3704	0.00084741	8	15	6	15	20	49	26	32	Gm29154
ENSMUSG00000043089	down	-1.7396	0.00085052	6	4	8	2	21	20	20	15	Mmp1a
ENSMUSG00000039814	down	-1.3004	0.00087814	8	9	8	16	23	31	33	26	Xkr5
ENSMUSG00000103473	down	-1.6395	0.00088519	10	6	2	5	21	17	22	20	Gm37696
ENSMUSG00000108957	down	-1.314	0.00091368	7	20	6	10	24	31	30	34	Gm45235
ENSMUSG00000031144	down	-4.5167	0.00091741	0	0	0	0	5	6	4	4	Syp
ENSMUSG00000030074	down	-1.1857	0.00092725	14	11	8	14	25	32	32	31	Gxylt2
ENSMUSG00000097852	down	-2.4263	0.00095577	2	2	2	4	17	27	3	14	4933405D12Rik
ENSMUSG00000086638	down	-1.1593	0.00096782	12	15	10	12	24	36	31	32	4930405A21Rik
ENSMUSG00000103383	down	-1.8175	0.00097724	4	3	2	8	19	13	17	18	Gm37754
ENSMUSG00000097793	down	-1.5073	0.00098505	6	11	6	4	18	21	25	22	Gm17259
ENSMUSG00000115856	down	-1.4055	0.0010098	6	15	6	7	21	21	25	34	Gm18095
ENSMUSG00000039563	down	-1.1993	0.0010227	18	14	12	8	29	39	23	45	2210406O10Rik
ENSMUSG00000083353	down	-1.981	0.0010246	5	3	0	8	12	25	17	16	Gm12540
ENSMUSG00000029811	down	-3.0897	0.0010698	0	1	2	1	7	6	10	16	Aoc1
ENSMUSG00000074183	down	-1.8119	0.0010764	36	30	30	28	158	48	213	62	Gsta1
ENSMUSG00000101337	down	-1.455	0.0010783	11	5	8	6	26	21	16	31	Dnah7c
ENSMUSG00000109015	down	-1.0577	0.0010976	12	22	17	18	46	51	27	38	Gm31024
ENSMUSG00000079339	down	-1.912	0.0010998	8	2	2	4	10	23	16	19	Ifit1bl1
ENSMUSG00000098082	down	-4.2511	0.001112	1	0	0	0	2	6	10	8	Gm20574
ENSMUSG00000107842	down	-1.4271	0.0011321	6	7	7	10	25	15	23	28	Gm44089
ENSMUSG00000031376	down	-1.6803	0.0011641	7	9	3	2	18	17	22	18	Atp2b3
ENSMUSG00000052387	down	-1.1088	0.0011836	19	11	16	16	50	28	30	44	Trpm3
ENSMUSG00000085786	down	-1.7146	0.001236	9	4	3	4	21	11	19	23	Gm15987
ENSMUSG00000052921	down	-1.8389	0.0012529	4	8	6	4	19	6	29	35	Arhgef15
ENSMUSG00000041540	down	-1.1807	0.0012818	14	12	9	10	22	29	30	34	Sox5
ENSMUSG00000072849	down	-1.1042	0.0013125	20	19	12	12	24	47	43	38	Serpina1e
ENSMUSG00000104037	down	-1.2903	0.00132	13	6	6	20	34	32	30	27	Gm37776
ENSMUSG00000026463	down	-1.0894	0.0013207	11	12	14	24	40	30	38	38	Atp2b4
ENSMUSG00000028883	down	-1.1799	0.0013607	11	9	10	20	30	39	23	36	Sema3a
ENSMUSG00000110165	down	-1.4336	0.0013747	5	20	4	8	23	30	23	35	Btf3-ps18
ENSMUSG00000020798	down	-2.5178	0.0013815	4	2	1	0	7	11	15	12	Spns3
ENSMUSG00000097749	down	-1.5318	0.0014452	3	6	5	10	20	22	16	20	Gm16938
ENSMUSG00000024500	down	-4.488	0.0014498	0	0	0	0	3	6	2	8	Ppp2r2b
ENSMUSG00000042672	down	-1.0228	0.0014615	11	19	14	23	44	42	29	38	Dcst1
ENSMUSG00000118367	down	-1.3614	0.0014717	9	7	6	8	18	24	20	25	Gm50277
ENSMUSG00000087187	down	-1.9593	0.0015018	0	2	8	8	31	16	16	17	Gm13431
ENSMUSG00000026787	down	-1.8048	0.0015232	2	6	2	6	16	18	16	12	Gad2
ENSMUSG00000073722	down	-4.4662	0.0016611	0	0	0	0	4	4	8	2	4931408C20Rik
ENSMUSG00000106961	down	-1.0734	0.0016968	16	27	6	25	33	45	40	55	Gm43128
ENSMUSG00000035694	down	-2.1982	0.0017494	1	4	0	5	9	14	11	17	Caps2
ENSMUSG00000048826	down	-1.3258	0.0017504	9	15	6	10	27	17	23	46	Dact2
ENSMUSG00000100287	down	-2.8097	0.0017555	2	1	0	2	4	14	12	9	Gm28068
ENSMUSG00000115333	down	-1.3595	0.0017575	13	8	5	6	22	25	25	20	Gm34590
ENSMUSG00000109127	down	-2.2253	0.0017607	4	4	2	0	7	20	10	16	Gm31135
ENSMUSG00000096010	down	-1.017	0.0017998	14	14	17	24	50	37	38	32	H4f16
ENSMUSG00000054074	down	-1.6959	0.001841	0	18	4	9	32	24	20	35	Skida1
ENSMUSG00000103292	down	-1.4521	0.0018806	3	14	10	4	23	28	19	26	Gm35048
ENSMUSG00000048096	down	-3.8482	0.0019544	0	2	0	0	4	6	13	9	Lmod1
ENSMUSG00000102935	down	-2.3796	0.001962	0	2	2	3	10	10	10	11	Gm38355
ENSMUSG00000087440	down	-1.2317	0.0019661	9	10	7	17	34	35	21	23	4930577N17Rik
ENSMUSG00000110424	down	-1.3069	0.0019798	7	9	6	9	21	22	22	21	1700012D14Rik
ENSMUSG00000104253	down	-1.2515	0.0019893	8	14	7	9	23	30	17	32	Gm37174
ENSMUSG00000020227	down	-3.8229	0.00199	0	0	2	0	13	4	8	7	Irak3
ENSMUSG00000021640	down	-1.3939	0.0021898	12	15	6	3	25	29	16	37	Naip1
ENSMUSG00000118120	down	-1.5657	0.0022313	7	5	9	3	13	17	19	33	Gm33732
ENSMUSG00000064141	down	-1.2621	0.0022687	8	9	7	10	27	24	16	25	Zfp69
ENSMUSG00000106219	down	-1.4964	0.0022698	7	7	7	7	18	27	32	11	5830416I19Rik
ENSMUSG00000039385	down	-1.2331	0.0022977	7	8	8	14	20	24	25	29	Cdh6
ENSMUSG00000026548	down	-1.413	0.002403	8	7	6	6	22	12	23	24	Slamf9
ENSMUSG00000020642	down	-1.0834	0.0024487	16	14	15	13	34	52	26	27	Rnf144a
ENSMUSG00000117994	down	-1.1818	0.0024636	11	16	8	9	31	25	34	21	Gm5820
ENSMUSG00000102833	down	-4.2687	0.002496	0	0	0	0	4	4	4	4	Gm9694
ENSMUSG00000117197	down	-1.8619	0.0025375	2	2	4	6	8	18	12	20	Gm6618
ENSMUSG00000104675	down	-4.3834	0.0025858	0	0	0	0	6	2	7	2	Gm43689
ENSMUSG00000105509	down	-1.0359	0.002696	14	13	18	11	27	31	31	42	C130013H08Rik
ENSMUSG00000112705	down	-1.0525	0.0027437	20	9	21	20	26	40	46	54	Gm47552
ENSMUSG00000110690	down	-2.7718	0.0027468	0	1	0	4	11	5	9	13	Gm18001
ENSMUSG00000038567	down	-1.5219	0.0028508	4	11	2	6	16	20	20	17	Cyp24a1
ENSMUSG00000087307	down	-2.8737	0.0028742	2	0	0	2	8	10	6	9	Gm12925
ENSMUSG00000071042	down	-2.2225	0.0029043	6	6	0	0	8	16	11	28	Rasgrp3
ENSMUSG00000060429	down	-4.2794	0.0029479	0	0	0	0	4	2	6	4	Sntb1
ENSMUSG00000082789	down	-2.6363	0.0029843	1	2	2	0	12	8	9	6	Gm13284
ENSMUSG00000050702	down	-4.5511	0.0030714	0	0	0	0	6	6	7	0	4930563M21Rik
ENSMUSG00000027204	down	-1.0812	0.0030984	9	14	10	16	28	23	35	30	Fbn1
ENSMUSG00000086866	down	-1.8707	0.0031683	2	7	4	1	12	13	21	11	4930512H18Rik
ENSMUSG00000005947	down	-1.4776	0.0032238	5	4	4	12	21	26	15	16	Itgae
ENSMUSG00000048387	down	-2.0951	0.0032345	1	2	2	4	12	8	13	10	Osr1
ENSMUSG00000105283	down	-1.0907	0.0033925	19	16	10	9	45	31	27	26	Gm33370
ENSMUSG00000053574	down	-1.1907	0.0034629	16	13	6	6	27	21	27	30	4930563E22Rik
ENSMUSG00000022537	down	-1.0315	0.0037046	16	27	17	9	34	30	36	60	Tmem44
ENSMUSG00000044056	down	-1.0374	0.0037132	9	25	11	13	28	40	31	34	Efcab9
ENSMUSG00000007591	down	-1.3275	0.0038194	7	8	8	4	18	20	16	23	Tssk4
ENSMUSG00000006642	down	-1.2755	0.0038446	10	7	8	6	15	27	21	22	Tcf23
ENSMUSG00000087589	down	-1.7035	0.0039133	2	4	5	5	10	24	12	13	D430040D24Rik
ENSMUSG00000031445	down	-4.2633	0.0039279	0	0	0	0	8	2	2	4	Proz
ENSMUSG00000085984	down	-1.062	0.0039324	25	12	6	18	38	40	26	39	1700001G11Rik
ENSMUSG00000085042	down	-1.7874	0.0039882	2	6	2	3	15	11	12	12	Abhd11os
ENSMUSG00000103897	down	-1.6752	0.0040064	7	2	6	2	17	10	18	17	Pcdhga8
ENSMUSG00000029321	down	-2.1166	0.0040095	0	7	0	4	9	15	15	13	Slc10a6
ENSMUSG00000097075	down	-2.2553	0.0041513	4	2	0	2	13	5	8	17	Cdiptos
ENSMUSG00000113528	down	-2.4199	0.0041737	0	6	0	2	16	8	16	6	Gm32699
ENSMUSG00000032274	down	-3.3141	0.0041854	0	0	0	3	6	4	5	19	Cyp19a1
ENSMUSG00000085091	down	-2.3702	0.0042422	2	2	3	0	4	11	8	19	Egfros
ENSMUSG00000036913	down	-1.5048	0.0046768	7	2	6	8	28	20	12	14	Trim67
ENSMUSG00000116697	down	-4.4199	0.0047628	0	0	0	0	6	8	0	4	Gm49694
ENSMUSG00000086119	down	-1.6612	0.0047653	4	3	6	3	8	13	16	21	Gm2415
ENSMUSG00000104965	down	-1.6232	0.0048481	2	11	4	2	19	17	16	13	Gm43437
ENSMUSG00000084081	down	-3.7984	0.0048806	0	0	0	1	4	8	4	3	Gm12057
ENSMUSG00000073491	down	-4.2431	0.0049578	0	0	0	0	1	7	2	6	Ifi213
ENSMUSG00000111662	down	-1.1702	0.0052097	9	4	17	16	33	24	26	36	Gm7435
ENSMUSG00000097121	down	-1.2266	0.0052587	17	12	11	4	41	19	32	24	D130020L05Rik
ENSMUSG00000081769	down	-1.1716	0.0053095	10	9	18	7	34	30	30	19	Gm12216
ENSMUSG00000085498	down	-1.0091	0.0053543	12	10	10	18	30	31	27	25	Gm14023
ENSMUSG00000035852	down	-1.1187	0.0054081	12	10	6	21	18	33	32	36	Misp
ENSMUSG00000018727	down	-1.0934	0.005417	9	18	9	15	26	37	16	44	Cpsf4l
ENSMUSG00000063683	down	-1.2162	0.0054213	8	7	6	10	17	17	23	24	Glyat
ENSMUSG00000105345	down	-1.4792	0.0055209	8	17	4	2	16	32	30	17	BC030343
ENSMUSG00000041205	down	-1.2514	0.005575	8	9	12	4	24	28	14	24	Map6d1
ENSMUSG00000110341	down	-1.5454	0.0056144	7	7	4	4	22	23	5	23	Gm45424
ENSMUSG00000039699	down	-1.2976	0.0057209	12	13	6	4	35	24	12	26	Batf2
ENSMUSG00000042874	down	-4.074	0.0057269	0	0	0	0	2	4	4	4	D930007J09Rik
ENSMUSG00000054135	down	-1.5972	0.0057436	6	4	2	5	17	18	7	16	A430110L20Rik
ENSMUSG00000114424	down	-1.0671	0.0057725	17	14	10	8	40	23	21	32	Gm47414
ENSMUSG00000015829	down	-1.5133	0.0058443	5	12	4	4	17	14	11	39	Tnr
ENSMUSG00000097378	down	-1.2512	0.0059198	8	6	9	6	18	19	24	17	B230208H11Rik
ENSMUSG00000000308	down	-3.043	0.0059446	1	0	0	2	4	6	6	12	Ckmt1
ENSMUSG00000028182	down	-1.0493	0.0060173	17	8	23	49	60	66	48	53	Lrriq3
ENSMUSG00000042607	down	-1.1702	0.0062663	6	6	12	12	24	28	20	20	Asb4
ENSMUSG00000047842	down	-2.1078	0.006277	0	2	2	4	10	7	8	14	Diras2
ENSMUSG00000024065	down	-1.6838	0.0063473	4	0	4	8	14	16	16	12	Ehd3
ENSMUSG00000099804	down	-1.9737	0.0063602	4	2	0	4	14	7	8	15	Gm28497
ENSMUSG00000087341	down	-3.6064	0.0066508	1	0	1	0	3	1	10	14	0610040F04Rik
ENSMUSG00000001348	down	-1.3962	0.0066971	8	13	2	7	20	10	30	27	Acp5
ENSMUSG00000050014	down	-1.376	0.0067683	8	4	5	6	19	19	18	11	Apol10b
ENSMUSG00000107726	down	-1.6117	0.0068134	6	6	2	2	11	10	14	20	Gm44037
ENSMUSG00000008129	down	-1.1157	0.0068939	12	22	7	17	14	47	35	44	Brme1
ENSMUSG00000083340	down	-4.0787	0.0070363	0	0	0	0	1	4	5	4	Gm13156
ENSMUSG00000032226	down	-4.0501	0.007044	0	0	0	0	2	4	2	6	Gcnt3
ENSMUSG00000109961	down	-2.7031	0.0070851	2	2	0	0	7	4	9	9	Gm31983
ENSMUSG00000103187	down	-1.5275	0.007334	8	2	4	5	17	8	18	19	Gm37087
ENSMUSG00000064288	down	-1.0825	0.0073412	14	19	10	5	22	33	22	38	H4c12
ENSMUSG00000049872	down	-1.359	0.0073846	10	6	6	2	15	20	15	20	Calhm5
ENSMUSG00000087192	down	-4.0666	0.0074675	0	0	0	0	5	1	3	5	Lexis1
ENSMUSG00000022868	down	-3.7703	0.0075093	0	1	0	0	6	1	3	9	Ahsg
ENSMUSG00000110910	down	-2.845	0.0075748	4	0	0	0	12	6	10	4	4921534A09Rik
ENSMUSG00000074676	down	-2.4135	0.0076378	4	1	0	1	16	6	4	10	Foxs1
ENSMUSG00000085261	down	-1.5219	0.0076418	5	6	2	5	18	18	7	15	Gm13814
ENSMUSG00000061048	down	-1.0091	0.0076808	14	15	6	16	20	37	24	34	Cdh3
ENSMUSG00000100158	down	-1.2229	0.0076834	10	7	8	5	26	19	19	15	Gm28119
ENSMUSG00000061397	down	-1.0031	0.0076827	14	25	12	8	36	42	21	34	Krt79
ENSMUSG00000064329	down	-2.6903	0.007687	2	2	0	0	8	4	6	11	Scn1a
ENSMUSG00000049350	down	-2.0829	0.007816	4	4	0	2	12	10	3	23	Zg16
ENSMUSG00000062151	down	-1.1853	0.007882	5	7	8	10	21	16	19	21	Unc13c
ENSMUSG00000111069	down	-2.6479	0.0078944	2	2	0	0	5	8	7	8	Gm48646
ENSMUSG00000084797	down	-1.2074	0.0079983	8	4	8	12	18	28	15	23	Gm14321
ENSMUSG00000097251	down	-1.4794	0.0080127	4	8	2	4	16	14	11	15	5033417F24Rik
ENSMUSG00000026644	down	-3.9736	0.0081739	0	0	0	0	2	4	4	3	Acbd7
ENSMUSG00000034739	down	-1.5629	0.0082802	6	6	4	1	13	9	14	21	Mfrp
ENSMUSG00000113031	down	-1.8554	0.0084326	3	3	1	4	7	7	10	21	Gm34552
ENSMUSG00000103898	down	-1.6374	0.0086081	10	8	0	2	18	10	18	23	Gm30238
ENSMUSG00000069554	down	-3.3933	0.0088563	0	0	0	2	3	7	4	10	I830134H01Rik
ENSMUSG00000032334	down	-1.5742	0.0091097	8	2	3	7	18	19	23	6	Loxl1
ENSMUSG00000115180	down	-1.5331	0.0093865	9	2	3	3	14	15	10	17	Gm30556
ENSMUSG00000106625	down	-3.5533	0.0097754	0	1	0	0	5	4	4	3	Gm43344
ENSMUSG00000056632	down	-3.6279	0.0099584	0	1	0	0	2	2	6	7	Dsg3
ENSMUSG00000054994	down	-1.0704	0.010112	8	13	10	11	16	36	17	31	AV320801
ENSMUSG00000097053	down	-2.2428	0.010234	2	2	0	2	5	7	6	14	Gm1972
ENSMUSG00000038642	down	-2.439	0.010337	1	4	0	0	6	8	7	9	Ctss
ENSMUSG00000105881	down	-1.0082	0.010705	9	10	13	10	17	25	25	29	4932422M17Rik
ENSMUSG00000000248	down	-1.7167	0.010913	4	4	8	0	16	14	6	26	Clec2g
ENSMUSG00000106820	down	-1.2034	0.010932	14	8	4	6	24	20	24	14	D5Ertd605e
ENSMUSG00000090358	down	-1.3439	0.010967	2	8	4	10	17	24	12	15	Gm2822
ENSMUSG00000117768	down	-2.1001	0.011053	2	0	2	4	10	18	4	7	8030456M14Rik
ENSMUSG00000103685	down	-2.121	0.011067	4	0	2	2	16	6	13	4	Gm37074
ENSMUSG00000097997	down	-2.98	0.01117	3	0	0	0	10	7	2	8	Gm27017
ENSMUSG00000078898	down	-2.8476	0.01125	0	1	2	0	5	9	3	8	Zfp968
ENSMUSG00000097339	down	-2.843	0.011255	2	1	0	0	4	8	7	5	Gm26671
ENSMUSG00000040280	down	-1.2725	0.01156	10	7	3	4	16	18	15	16	Ndufa4l2
ENSMUSG00000112545	down	-1.5645	0.011886	3	2	4	8	7	24	11	15	1300014J16Rik
ENSMUSG00000102112	down	-1.7489	0.011998	2	2	3	3	9	7	11	11	1810041H14Rik
ENSMUSG00000101400	down	-2.074	0.012077	1	0	5	2	11	4	13	11	Gm29596
ENSMUSG00000116478	down	-1.3178	0.012103	5	11	4	4	9	20	17	21	Gm18890
ENSMUSG00000030116	down	-3.8691	0.012136	0	0	0	0	4	2	4	2	Mfap5
ENSMUSG00000087305	down	-1.8544	0.01225	2	3	0	5	14	6	9	11	A430035B10Rik
ENSMUSG00000118295	down	-1.087	0.012296	7	11	8	9	23	16	27	17	Gm8437
ENSMUSG00000052726	down	-4.1364	0.012558	0	0	0	0	2	7	0	6	Kcnt2
ENSMUSG00000058550	down	-3.5973	0.012663	0	0	1	0	2	6	1	8	Dppa4
ENSMUSG00000109599	down	-1.5565	0.012708	4	4	2	5	7	11	10	22	Gm31812
ENSMUSG00000086145	down	-3.4596	0.012842	0	1	0	0	4	4	4	3	Gm15479
ENSMUSG00000115456	down	-3.4492	0.012851	0	0	1	0	4	4	3	4	Gm35248
ENSMUSG00000115970	down	-2.3169	0.012865	1	2	2	0	9	5	9	5	8430426J06Rik
ENSMUSG00000027070	down	-1.0196	0.012907	23	12	5	10	29	33	20	32	Lrp2
ENSMUSG00000111874	down	-1.1408	0.012936	5	10	10	6	17	17	25	18	Gm36539
ENSMUSG00000110747	down	-3.7063	0.013	0	0	1	0	7	0	4	7	Gm35657
ENSMUSG00000095836	down	-1.1511	0.013037	9	9	5	5	19	18	14	19	Gm21960
ENSMUSG00000052783	down	-1.16	0.013132	5	25	4	13	29	36	17	34	Grk4
ENSMUSG00000034677	down	-1.4094	0.013234	8	9	1	3	21	14	11	16	Gpr142
ENSMUSG00000031325	down	-1.356	0.013328	4	4	4	8	14	10	12	22	4930519F16Rik
ENSMUSG00000039057	down	-1.4111	0.013353	4	8	2	4	14	11	16	12	Myo16
